# Supplementary material for: Treatment of electrochemical plating wastewater by heterogeneous photocatalysis: the simultaneous removal of 6:2 fluorotelomer sulfonate and hexavalent chromium
Source: Royal Society of Chemistry journal article supplement (doi:10.1039/d1ra06235b), 2021-01-01
Supplement: d1ra06235b1.pdf [file d1ra06235b1.pdf]

*Supplementary Information for*

**Treatment of Electrochemical Plating Wastewater by  
Heterogeneous Photocatalysis: The Simultaneous  
Removal of 6:2 Fluorotelomer Sulfonate and  
Hexavalent Chromium**

Hak-Hyeon Kim, Seyfollah Gilak Hakimabadi, Anh Le-Tuan Pham\*

*Department of Civil and Environmental Engineering, University of Waterloo*

*Waterloo, ON N2L 3G1, Canada*

**Submitted to *RSC Advances***

\*Corresponding author

Tel.: +1-519-888-4567 ext. 30337; E-mail: [anh.pham@uwaterloo.ca](mailto:anh.pham@uwaterloo.ca)

**Table S1.** BET surface area of the as received photocatalysts.

| <b>Photocatalyst</b>           | <b>BET Surface area (m<sup>2</sup>/g)</b> |
|--------------------------------|-------------------------------------------|
| Ga <sub>2</sub> O <sub>3</sub> | 19.5                                      |
| In <sub>2</sub> O <sub>3</sub> | 7.1                                       |
| TiO <sub>2</sub>               | 51.9                                      |

**Table S2.** Formula and molecular weight of investigated PFASs.

| <b>Chemical</b>                  | <b>Abbreviation</b> | <b>Formula</b>           | <b>Molecular weight<br/>(g/mol)</b> |
|----------------------------------|---------------------|--------------------------|-------------------------------------|
| 6:2 Fluorotelomer<br>sulfonate   | 6:2 FtS             | $C_6F_{13}CH_2CH_2SO_3H$ | 428.16                              |
| 6:2 Fluorotelomer<br>carboxylate | 6:2 FtCA            | $C_6F_{13}CH_2COOH$      | 378.09                              |
| Perfluoroheptanoate              | PFHpA               | $C_6F_{13}COOH$          | 364.06                              |
| Perfluorohexanoate               | PFHxA               | $C_5F_{11}COOH$          | 314.05                              |
| Perfluoropentanoate              | PFPeA               | $C_5F_9COOH$             | 264.05                              |
| Perfluorobutanoate               | PFBA                | $C_4F_7COOH$             | 214.04                              |

**Table S3.** Quantitative analytical method.

|                                  |                                                                        |                           |                                          |                        |                                 |
|----------------------------------|------------------------------------------------------------------------|---------------------------|------------------------------------------|------------------------|---------------------------------|
| <b>Instrument</b>                | Shimadzu LCMS-8030 Triple Quadrupole Mass Spectrometer                 |                           |                                          |                        |                                 |
| <b>Ionization</b>                | Negative electrospray                                                  |                           |                                          |                        |                                 |
| <b>Precolumn</b>                 | Guard Column Thermo Scientific™ Acclaim 120 Å C18, 4.6 x 10 mm, 5 µm   |                           |                                          |                        |                                 |
| <b>Column</b>                    | Agilent Infinity Lab Poroshell 120 Å EC-C18, 3.0 x 50 mm, 2.7 µm       |                           |                                          |                        |                                 |
| <b>Column oven temperature</b>   | 30°C                                                                   |                           |                                          |                        |                                 |
| <b>Injection</b>                 | 30 µL                                                                  |                           |                                          |                        |                                 |
| <b>Mobile phases</b>             | A: 5 mM ammonium acetate in LCMS grade water<br>B: LCMS grade Methanol |                           |                                          |                        |                                 |
| <b>Flow rate</b>                 | 0.5 mL/min                                                             |                           |                                          |                        |                                 |
| <b>Gradient profile</b>          | <b>Time (min)</b>                                                      | <b>Eluent A Conc. (%)</b> | <b>Eluent B Conc. (%)</b>                |                        |                                 |
|                                  | 0                                                                      | 60                        | 40                                       |                        |                                 |
|                                  | 0.5                                                                    | 60                        | 40                                       |                        |                                 |
|                                  | 4.5                                                                    | 20                        | 80                                       |                        |                                 |
|                                  | 10                                                                     | 20                        | 80                                       |                        |                                 |
|                                  | 10.5                                                                   | 60                        | 40                                       |                        |                                 |
|                                  | 13.5                                                                   | Stop                      |                                          |                        |                                 |
| <b>Monitored ion transitions</b> | <b>Analytes</b>                                                        | <b>Ion transitions</b>    | <b>Internal standards</b>                | <b>Ion transitions</b> | <b>Calibration range (µg/L)</b> |
|                                  | 6:2 FtS                                                                | 427 > 407                 | [ <sup>13</sup> C <sub>2</sub> ]M6:2FtS  | 429 > 81               | 0.05 - 20                       |
|                                  | 6:2 FtCA                                                               | 377 > 293                 | [ <sup>13</sup> C <sub>2</sub> ]M6:2FtCA | 379 > 294              | 0.05 - 20                       |
|                                  | PFHpA                                                                  | 363 > 319                 | [ <sup>13</sup> C <sub>4</sub> ]MPFHpA   | 367 > 322              | 0.05 - 20                       |
|                                  | PFHxA                                                                  | 313 > 629                 | [ <sup>13</sup> C <sub>5</sub> ]MPFHxA   | 315 > 270              | 0.05 - 20                       |
|                                  | PFPeA                                                                  | 263 > 219                 | [ <sup>13</sup> C <sub>5</sub> ]MPFPeA   | 268 > 223              | 0.25 - 20                       |
|                                  | PFBA                                                                   | 213 > 169                 | [ <sup>13</sup> C <sub>4</sub> ]MPFBA    | 217 > 172              | 0.25 - 20                       |

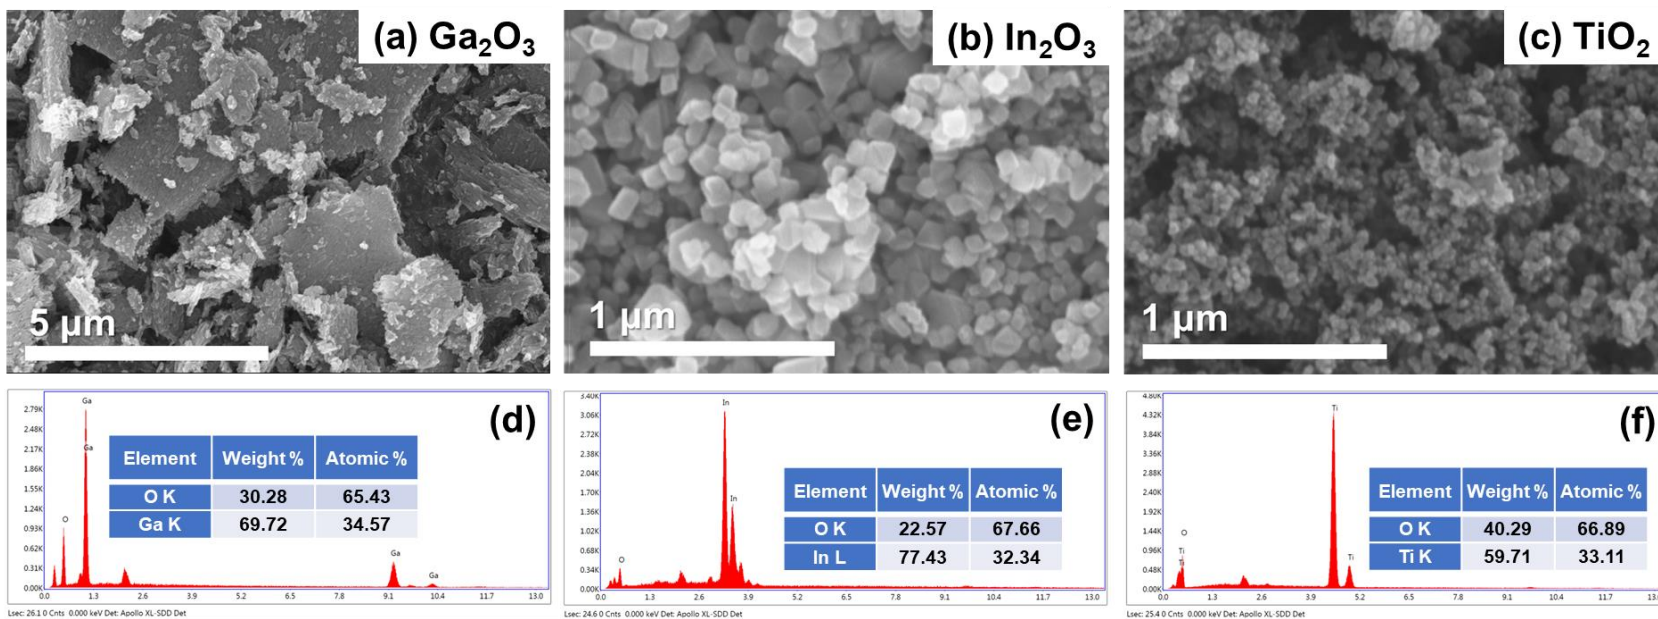

**Figure S1.** SEM images and EDS analyses of the as received photocatalysts.

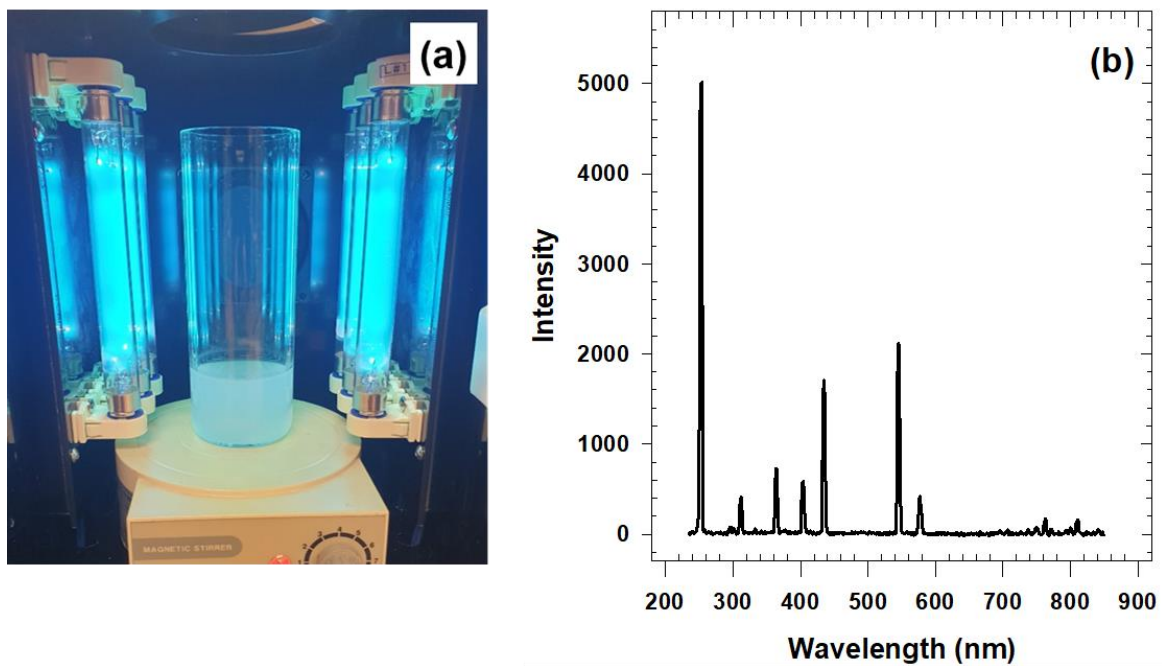

**Figure S2.** (a) photograph of the 4W UV-C lamp-equipped photoreactor box and (b) intensity of UV-C light (6 units) versus wavelength.

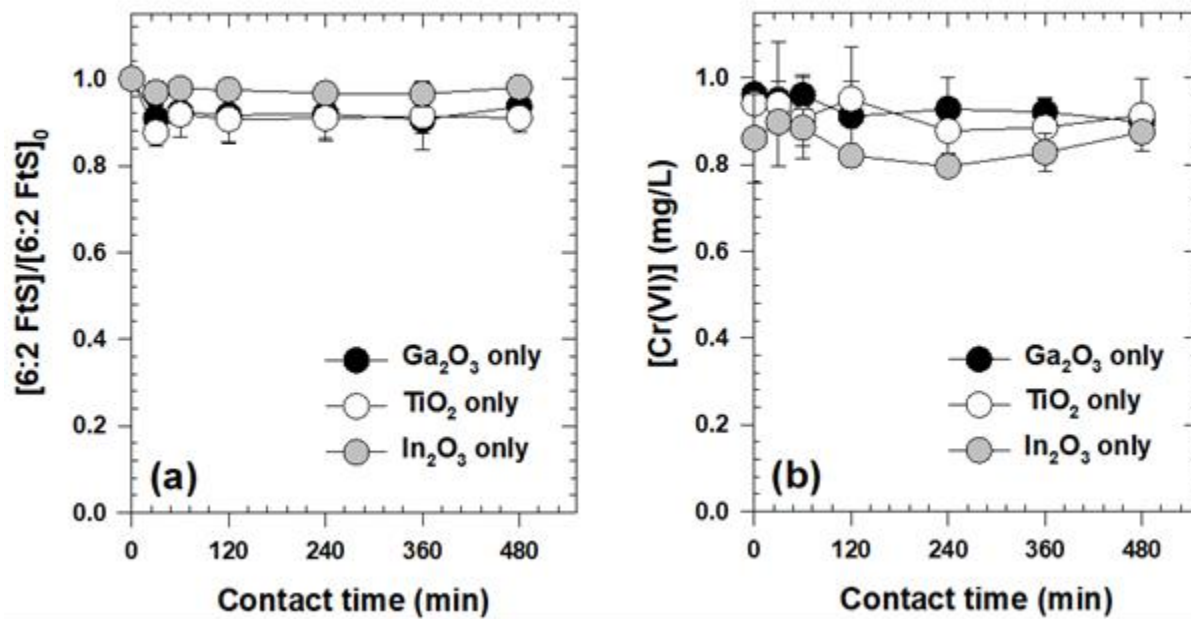

**Figure S3.** The removals of 6:2 FtS (a) and Cr(VI) (b) by Ga<sub>2</sub>O<sub>3</sub>, In<sub>2</sub>O<sub>3</sub>, and TiO<sub>2</sub> photocatalysts in the absence of light. [catalyst]=0.5 g/L, [6:2 FtS]<sub>0</sub> = 100 μg/L, [Cr(VI)]<sub>0</sub> = 1 mg/L, pH = 3.0 ± 1.

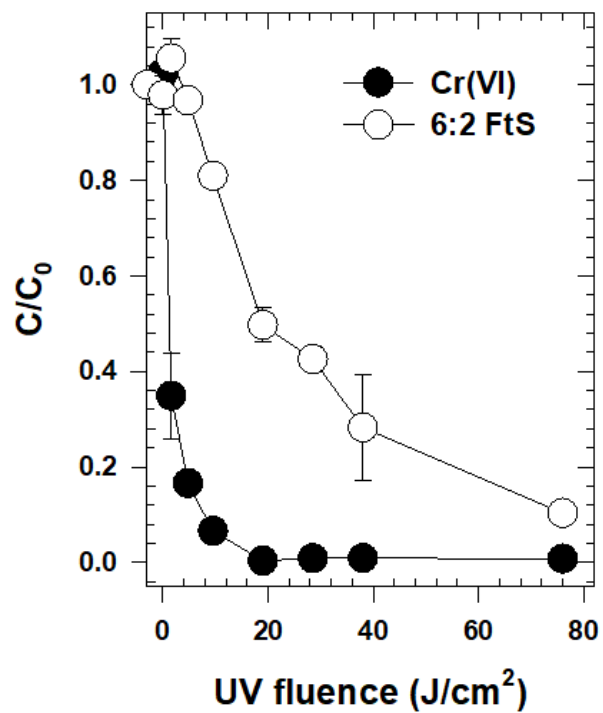

**Figure S4.** The removals of 6:2 FtS and Cr(VI) by UV-C/ $Ga_2O_3$  system.  $[Ga_2O_3] = 0.5$  g/L,  $[6:2 FtS]_0 = 2$  mg/L,  $[Cr(VI)]_0 = 20$  mg/L,  $pH = 3.0 \pm 1$ .



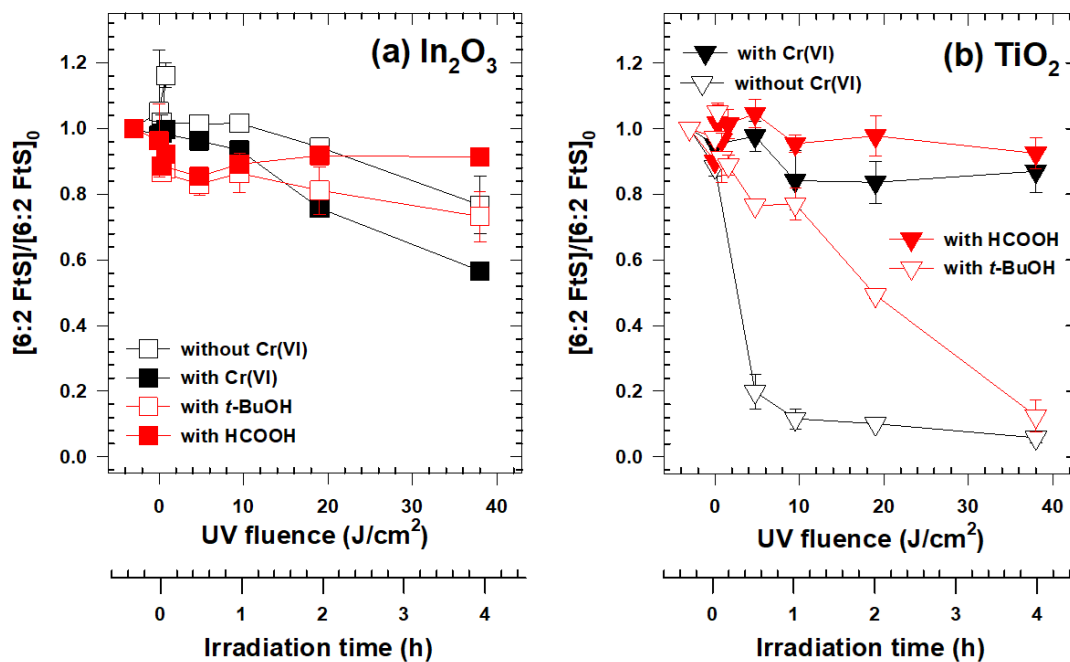

**Figure S5.** Nature of reactive species produced in the (a) UV-C/In<sub>2</sub>O<sub>3</sub>, and (b) UV-C/TiO<sub>2</sub> system. ([In<sub>2</sub>O<sub>3</sub>]<sub>0</sub> = [TiO<sub>2</sub>]<sub>0</sub> = 0.5 g/L (surface area-based doses: [In<sub>2</sub>O<sub>3</sub>] = 3.57 m<sup>2</sup>/L, [TiO<sub>2</sub>] = 25.94 m<sup>2</sup>/L), [6:2 FtS]<sub>0</sub> = 100 μg/L, [Cr(VI)] = 1 mg/L, [MeOH]<sub>0</sub> = 0.3 mM, pH<sub>i</sub> = 3, [*t*-BuOH]<sub>0</sub> = [HCOOH]<sub>0</sub> = 10 mM, Pre-sorption time = 60 min).

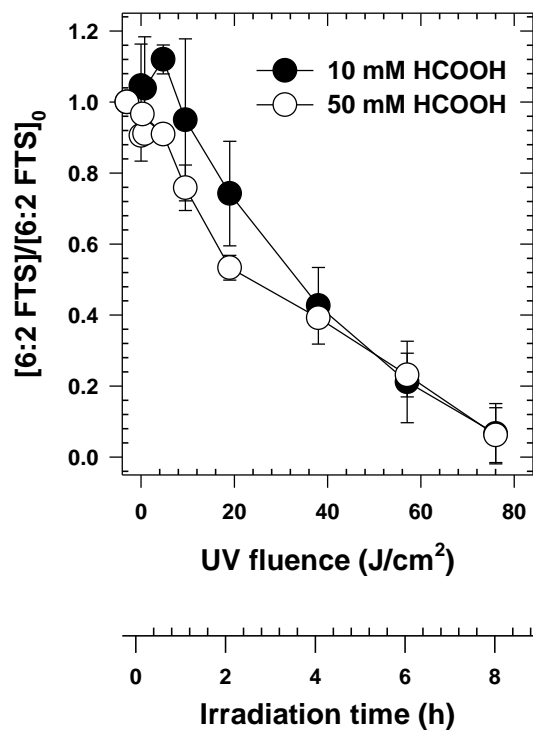

**Figure S6.** Effect of HCOOH doses on the degradation of 6:2 FtS by the UV-C/Ga<sub>2</sub>O<sub>3</sub> in the presence of Cr(VI). ([Ga<sub>2</sub>O<sub>3</sub>]<sub>0</sub> = 0.5 g/L (surface area-based dose: 9.76 m<sup>2</sup>/L), [6:2 FtS]<sub>0</sub> = 100 μg/L, [Cr(VI)] = 1 mg/L, [MeOH]<sub>0</sub> = 0.3 mM, pH<sub>i</sub> = 3, Pre-sorption time = 60 min).

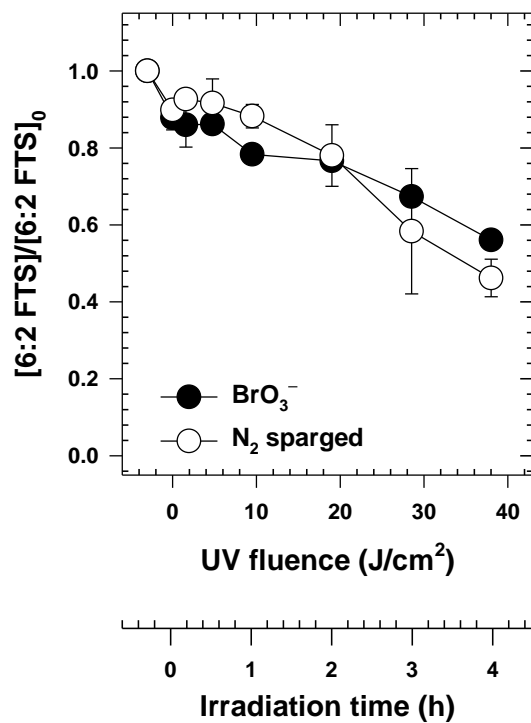

**Figure S7.** Effects of bromate or N<sub>2</sub> sparging on the degradation of 6:2 FtS by the UV-C/Ga<sub>2</sub>O<sub>3</sub> system. ([Ga<sub>2</sub>O<sub>3</sub>]<sub>0</sub> = 0.5 g/L (surface area-based dose: 9.76 m<sup>2</sup>/L), [6:2 FtS]<sub>0</sub> = 100 μg/L, [MeOH]<sub>0</sub> = 0.3 mM, [BrO<sub>3</sub><sup>-</sup>]<sub>0</sub> = 10 mM, pH<sub>i</sub> = 3, Pre-sorption time = 60 min)

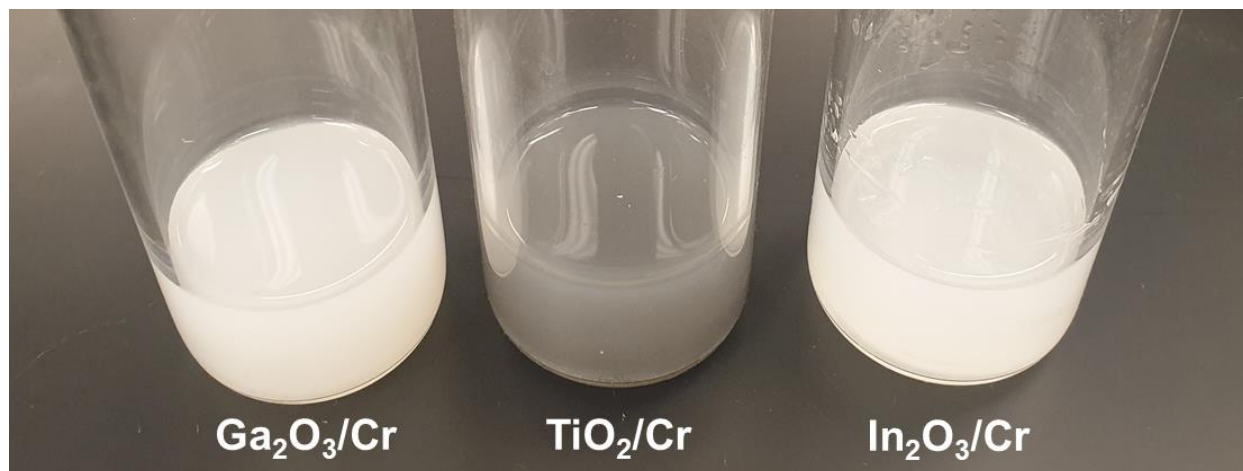

**Figure S8.** Photographs of  $\text{Ga}_2\text{O}_3/\text{Cr}$ ,  $\text{TiO}_2/\text{Cr}$ , and  $\text{In}_2\text{O}_3/\text{Cr}$  suspensions after 8 h UVC irradiation, respectively. ( $[\text{Ga}_2\text{O}_3]_0 = [\text{TiO}_2]_0 = [\text{In}_2\text{O}_3]_0 = 0.5 \text{ g/L}$  (surface area-based doses:  $[\text{Ga}_2\text{O}_3] = 9.76 \text{ m}^2/\text{L}$ ,  $[\text{In}_2\text{O}_3] = 3.57 \text{ m}^2/\text{L}$ ,  $[\text{TiO}_2] = 25.94 \text{ m}^2/\text{L}$ ),  $[\text{6:2 FtS}]_0 = 100 \text{ }\mu\text{g/L}$ ,  $[\text{Cr(VI)}] = 1 \text{ mg/L}$ ,  $[\text{MeOH}]_0 = 0.3 \text{ mM}$ ,  $\text{pH}_i = 3$ , Pre-sorption time = 60 min).

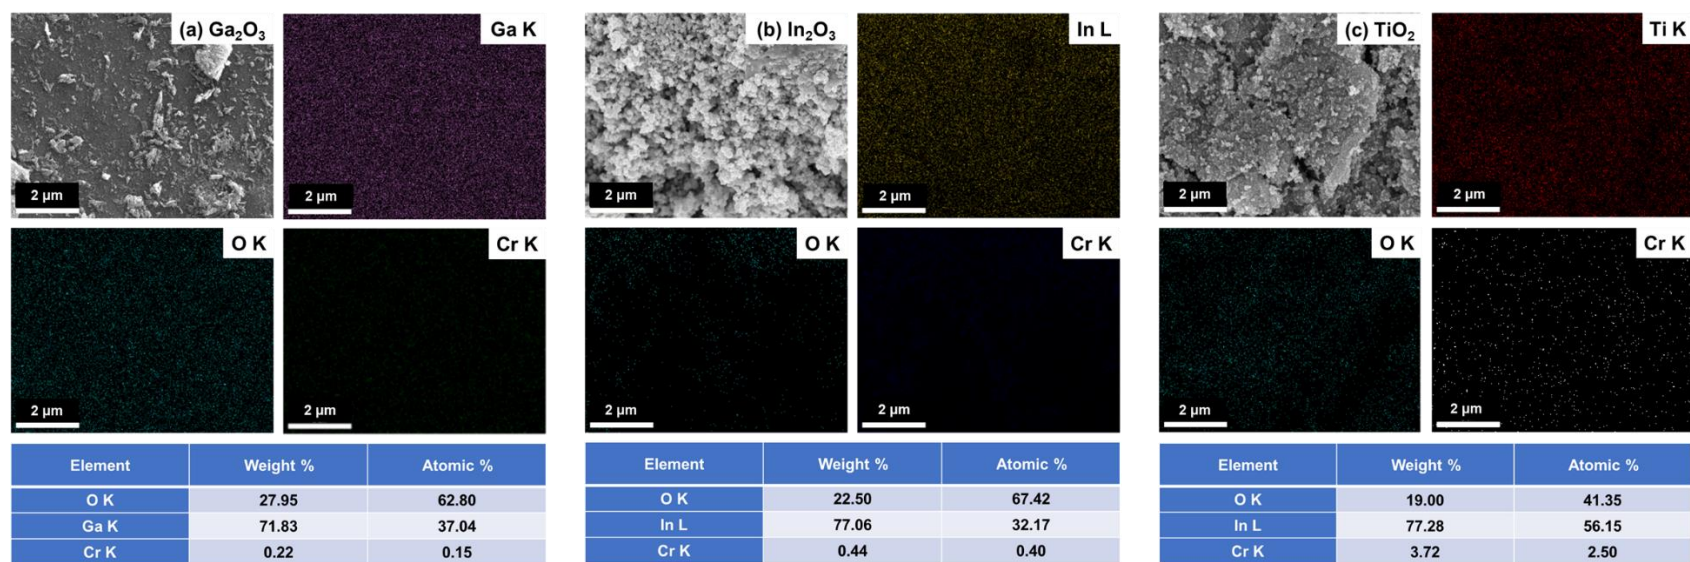

Figure S9. SEM/EDS images of the spent catalysts.
